# Supplementary material for: Estimated Impact of Achieving Optimal Cardiovascular Health Among US Adults on Cardiovascular Disease Events
Source: PubMed Central journal article supplement — J Am Heart Assoc. 2021 Mar 25;10(7):e019681. doi: 10.1161/JAHA.120.019681 (PMC8174373; doi:10.1161/jaha.120.019681), 2021-03-25
Supplement: JAH3-10-e019681-s001.pdf [file JAH3-10-e019681-s001.pdf]

# **SUPPLEMENTAL MATERIAL**

## Data S1.

### Expanded Methods. Description of Population Attributable Fraction Methodology

#### Population Attributable Fractions and Events Prevented

We calculated age-, sex-, and race/ethnicity-specific population attributable fractions (PAFs) to estimate the proportion of CVD events that could hypothetically be prevented (or postponed), assuming a causal relationship, if the entire US adult population (or subgroups) had high CVH, using the following formula:

$$PAF = \frac{\sum_{i=1}^k p_i(HR_i - 1)}{1 + \sum_{i=1}^k p_i(HR_i - 1)}$$

where  $p_i$  is the proportion of CVH level  $i$ ,  $HR_i$  is the age- and race-adjusted hazard ratio of CVD comparing CVH level  $i$  to the reference high CVH level, and  $k$  is the total number of CVH levels. For example, to calculate the estimated PAF for black women aged 40-59 years:

$$PAF = \frac{0.213(3.16 - 1) + 0.766(8.64 - 1)}{1 + 0.213(3.16 - 1) + 0.766(8.64 - 1)} = 86.3\%$$

We then multiplied the age-, sex-, and race/ethnicity-specific PAFs by the corresponding number of annual CVD events to estimate the absolute number of annual events that could be prevented. This process was conducted for each age, sex, and race/ethnicity, and aggregated. For example, to calculate the estimated number of annual CVD events prevented for black women aged 40-59 years:

$$Events\ Prevented = PAF * No.\ of\ Expected\ Events = 0.863 * 61424 = 53009$$

In a sensitivity analysis, we calculated potential impact fractions (PIFs) for the continuous CVH score with a similar overall approach, but using the following formula:

$$PIF = \frac{\int_{x=0}^m HR(x)P(x)dx - \int_{x=0}^m HR(x)P'(x)dx}{\int_{x=0}^m HR(x)P(x)dx}$$

where  $HR(x)$  is the hazard ratio for a 1-unit increase in CVH score,  $P(x)$  is the population distribution of the CVH score,  $P'(x)$  is the counterfactual distribution of the CVH score (e.g., the mean CVH score is increased 1 point in the US population), and  $m$  is the maximum CVH score (14; i.e., the theoretical minimum risk level).

### **Uncertainty Estimation**

We accounted for uncertainty in our estimation of the proportions of CVH score categories, incidence rates, and hazard ratios of CVD using Monte Carlo simulation. For each age-, sex-, and race/ethnicity-specific PAF calculation, numbers were randomly generated from assumed distributions for the prevalence of CVH level  $i$  (normal distribution with mean  $p_i$  and standard error  $SE_{pi}$ ; calculated using SAS PROC SURVEYFREQ) and the HR comparing CVH level  $i$  to high CVH (log-normal distribution with mean  $HR_i$  and  $SE_{HRi}$ ; calculated using Cox proportional hazards regression). Next, the incidence rate ( $IR$ ) of CVD was calculated using Poisson regression and the point estimate multiplied by the respective US population number to estimate the total number of annual CVD events, overall and by subgroup. Numbers of expected CVD events were assumed to be fixed. Finally, the PAF was multiplied by the total number of events to estimate the number of events prevented. For each age-, sex-, and race/ethnicity-specific calculation, 10,000 simulations were conducted for the PAF and events prevented. The 2.5<sup>th</sup> and 97.5<sup>th</sup> percentile estimates of the simulated distributions were used to form 95% confidence intervals. The same general approach was used for calculation of PAFs for the individual CVH metrics, and for calculation of PIFs.

**Table S1. Proportions of US Adults Meeting Recommended Levels of Cardiovascular Health Metrics by Age Group, Sex, and Race: The Lifetime Risk Pooling Project.**

| Health Metric                            | Definition   |                                  | Participants in CVH Categories, No. (%) |             |              |              |             |              |              |             |
|------------------------------------------|--------------|----------------------------------|-----------------------------------------|-------------|--------------|--------------|-------------|--------------|--------------|-------------|
|                                          |              |                                  | All Participants                        | Sex         |              | Race         |             | Age Group    |              |             |
|                                          |              |                                  |                                         | Men         | Women        | White/other  | Black       | Aged 20-39 y | Aged 40-59 y | Aged ≥60 y  |
| <b>Smoking</b>                           | Ideal        | Never or quit >12 months         | 14278 (46.9)                            | 4476 (37.3) | 9802 (53.2)  | 9505 (45.8)  | 4773 (49.2) | 2369 (55.9)  | 6347 (44.0)  | 5562 (47.2) |
|                                          | Intermediate | Former, quit ≤12 months          | 9847 (32.3)                             | 4831 (40.2) | 5016 (27.2)  | 7076 (34.1)  | 2771 (28.6) | 619 (14.6)   | 4594 (31.8)  | 4634 (39.3) |
|                                          | Poor         | Current                          | 6322 (20.8)                             | 2701 (22.5) | 3621 (19.6)  | 4172 (20.1)  | 2150 (22.2) | 1248 (29.5)  | 3491 (24.2)  | 1583 (13.4) |
| <b>Body mass index, kg/m<sup>2</sup></b> | Ideal        | <25                              | 11154 (36.6)                            | 3889 (32.4) | 7265 (39.4)  | 8443 (40.7)  | 2711 (28.0) | 2697 (63.7)  | 4666 (32.3)  | 3791 (32.2) |
|                                          | Intermediate | 25-29.99                         | 11407 (37.5)                            | 5567 (46.4) | 5840 (31.7)  | 8038 (38.7)  | 3369 (34.8) | 1019 (24.1)  | 5568 (38.6)  | 4820 (40.9) |
|                                          | Poor         | ≥30                              | 7886 (25.9)                             | 2552 (21.3) | 5334 (28.9)  | 4272 (20.6)  | 3614 (37.3) | 520 (12.3)   | 4198 (29.1)  | 3168 (26.9) |
| <b>Physical activity *</b>               | Ideal        | Fourth quartile                  | 7767 (25.5)                             | 3917 (32.6) | 3850 (20.9)  | 5786 (27.9)  | 1981 (20.4) | 1058 (25.0)  | 3732 (25.9)  | 2977 (25.3) |
|                                          | Intermediate | Third and second quartiles       | 15122 (49.7)                            | 5849 (48.7) | 9273 (50.3)  | 10463 (50.4) | 4659 (48.1) | 2119 (50.0)  | 7116 (49.3)  | 5887 (50.0) |
|                                          | Poor         | First quartile                   | 7558 (24.8)                             | 2242 (18.7) | 5316 (28.8)  | 4504 (21.7)  | 3054 (31.5) | 1059 (25.0)  | 3584 (24.8)  | 2915 (24.7) |
| <b>Healthy diet score †</b>              | Ideal        | Fifth and fourth quintiles       | 5450 (17.9)                             | 1568 (13.1) | 3882 (21.1)  | 3546 (17.1)  | 1904 (19.6) | 847 (20.0)   | 2539 (17.6)  | 2064 (17.5) |
|                                          | Intermediate | Third and second quintiles       | 11898 (39.1)                            | 4337 (36.1) | 7561 (41.0)  | 8063 (38.9)  | 3835 (39.6) | 1695 (40.0)  | 5686 (39.4)  | 4517 (38.3) |
|                                          | Poor         | First quintile                   | 13099 (43.0)                            | 6103 (50.8) | 6996 (37.9)  | 9144 (44.1)  | 3955 (40.8) | 1694 (40.0)  | 6207 (43.0)  | 5198 (44.1) |
| <b>Total cholesterol, mg/dL</b>          | Ideal        | <200 (untreated)                 | 13013 (42.7)                            | 5874 (48.9) | 7139 (38.7)  | 8768 (42.2)  | 4245 (43.8) | 3226 (76.2)  | 5887 (40.8)  | 3900 (33.1) |
|                                          | Intermediate | 200-239 or treated to goal       | 11410 (37.5)                            | 4373 (36.4) | 7037 (38.2)  | 8006 (38.6)  | 3404 (35.1) | 826 (19.5)   | 5532 (38.3)  | 5052 (42.9) |
|                                          | Poor         | ≥240                             | 6024 (19.8)                             | 1761 (14.7) | 4263 (23.1)  | 3979 (19.2)  | 2045 (21.1) | 184 (4.3)    | 3013 (20.9)  | 2827 (24.0) |
| <b>Blood pressure, mm Hg</b>             | Ideal        | <120/<80 (untreated)             | 11668 (38.3)                            | 4417 (36.8) | 7251 (39.3)  | 8796 (42.4)  | 2872 (29.6) | 3171 (74.9)  | 6250 (43.3)  | 2247 (19.1) |
|                                          | Intermediate | 120-139/80-89 or treated to goal | 12477 (41.0)                            | 5236 (43.6) | 7241 (39.3)  | 8219 (39.6)  | 4258 (43.9) | 963 (22.7)   | 5952 (41.2)  | 5562 (47.2) |
|                                          | Poor         | ≥140/90                          | 6302 (20.7)                             | 2355 (19.6) | 3947 (21.4)  | 3738 (18.0)  | 2564 (26.4) | 102 (2.4)    | 2230 (15.5)  | 3970 (33.7) |
| <b>Fasting glucose, mg/dL</b>            | Ideal        | <100 (untreated)                 | 19625 (64.5)                            | 6961 (58.0) | 12664 (68.7) | 13094 (63.1) | 6531 (67.4) | 4099 (96.8)  | 8924 (61.8)  | 6602 (56.0) |
|                                          | Intermediate | 100-125 or treated to goal       | 8549 (28.1)                             | 4139 (34.5) | 4410 (23.9)  | 6355 (30.6)  | 2194 (22.6) | 109 (2.6)    | 4522 (31.3)  | 3918 (33.3) |
|                                          | Poor         | ≥126                             | 2273 (7.5)                              | 908 (7.6)   | 1365 (7.4)   | 1304 (6.3)   | 969 (10.0)  | 28 (0.7)     | 986 (6.8)    | 1259 (10.7) |
| <b>Total CVH Score ‡</b>                 | High         | 12-14 points                     | 2270 (7.5)                              | 763 (6.4)   | 1507 (8.2)   | 1853 (8.9)   | 417 (4.3)   | 992 (23.4)   | 922 (6.4)    | 356 (3.0)   |
|                                          | Moderate     | 9-11 points                      | 10937 (35.9)                            | 4276 (35.6) | 6661 (36.1)  | 7790 (37.5)  | 3147 (32.5) | 2301 (54.3)  | 5138 (35.6)  | 3498 (29.7) |
|                                          | Low          | 0-8 points                       | 17240 (56.6)                            | 6969 (58.0) | 10271 (55.7) | 11110 (53.5) | 6130 (63.2) | 943 (22.3)   | 8372 (58.0)  | 7925 (67.3) |

CVH, cardiovascular health; LRPP, Cardiovascular Disease Lifetime Risk Pooling Project

\* In the LRPP, Z-scores were calculated from the distribution of physical activity scores in each individual cohort, measured using different metrics, and quartiles were computed. Ideal: 4<sup>th</sup> quartile; intermediate: 3<sup>rd</sup> and 2<sup>nd</sup> quartiles; poor: 1<sup>st</sup> quartile.

† In the LRPP, the Alternate Healthy Eating Index (AHEI-2010) was calculated in each individual cohort and quintiles were computed. Ideal: 5<sup>th</sup> and 4<sup>th</sup> quintiles; intermediate: 3<sup>rd</sup> and 2<sup>nd</sup> quintiles; poor: 1<sup>st</sup> quintile

‡ The total CVH score represents the sum of individual metric point values and ranges from 0 to 14. Each individual metric was scored as ideal (2 points), intermediate (1 point), or poor (0 points). We defined overall CVH as high (12-14 points), moderate (9-11 points), or low (0-8 points).

**Table S2. Proportions of US Adults Meeting Cardiovascular Health Metrics by Age Group: NHANES 2011-2016.**

| Health Metric                            | Definition   |                                                                                                | Proportion of US Adults, % (95% CI) |                  |                  |
|------------------------------------------|--------------|------------------------------------------------------------------------------------------------|-------------------------------------|------------------|------------------|
|                                          |              |                                                                                                | Aged 20-39 y                        | Aged 40-59 y     | Aged ≥60 y       |
| <b>Smoking</b>                           | Ideal        | Never or quit >12 months                                                                       | 74.5 (72.1-77.0)                    | 75.7 (73.5-77.9) | 88.2 (86.8-89.6) |
|                                          | Intermediate | Former, quit ≤12 months                                                                        | 4.3 (3.2-5.5)                       | 2.5 (1.6-3.4)    | 1.1 (0.7-1.6)    |
|                                          | Poor         | Current                                                                                        | 21.2 (19.1-23.2)                    | 21.8 (19.4-24.1) | 10.6 (9.4-11.9)  |
| <b>Body mass index, kg/m<sup>2</sup></b> | Ideal        | <25                                                                                            | 35.9 (33.0-38.7)                    | 25.9 (23.8-28.0) | 25.1 (22.6-27.7) |
|                                          | Intermediate | 25-29.99                                                                                       | 30.2 (27.9-32.4)                    | 33.7 (31.2-36.2) | 35.8 (33.5-38.0) |
|                                          | Poor         | ≥30                                                                                            | 33.9 (31.5-36.4)                    | 40.4 (37.5-43.3) | 39.1 (36.3-41.9) |
| <b>Physical activity</b>                 | Ideal        | ≥150 min/week moderate or<br>≥75 min/week vigorous or<br>≥150 combination                      | 48.9 (46.0-51.8)                    | 36.7 (33.7-39.8) | 29.9 (27.2-32.6) |
|                                          | Intermediate | 1 to 149 min/week moderate or<br>1 to 74 min/week vigorous or<br>1 to 149 min/week combination | 15.5 (14.1-16.9)                    | 18.7 (16.0-21.5) | 16.4 (14.5-18.3) |
|                                          | Poor         | None                                                                                           | 35.6 (32.4-38.8)                    | 44.5 (41.0-48.1) | 53.7 (50.6-56.8) |
| <b>Healthy diet score <sup>a</sup></b>   | Ideal        | 4-5 components                                                                                 | 0.2 (0.1-0.3)                       | 0.6 (0.3-0.8)    | 1.4 (1.0-1.8)    |
|                                          | Intermediate | 2-3 components                                                                                 | 19.6 (17.3-21.8)                    | 24.6 (21.9-27.4) | 32.0 (29.1-34.8) |
|                                          | Poor         | 0-1 components                                                                                 | 80.2 (77.9-82.5)                    | 74.8 (72.1-77.6) | 66.6 (63.7-69.6) |
| <b>Total cholesterol, mg/dL</b>          | Ideal        | <200 (untreated)                                                                               | 71.5 (68.9-74.1)                    | 36.4 (33.7-39.1) | 25.8 (23.7-28.0) |
|                                          | Intermediate | 200-239 or treated to goal                                                                     | 22.0 (19.6-24.3)                    | 45.6 (42.6-48.7) | 62.1 (59.7-64.6) |
|                                          | Poor         | ≥240                                                                                           | 6.5 (5.4-7.6)                       | 18.0 (16.1-19.9) | 12.0 (10.6-13.5) |
| <b>Blood pressure, mm Hg</b>             | Ideal        | <120/<80 (untreated)                                                                           | 64.9 (62.8-67.0)                    | 36.5 (34.0-39.1) | 15.5 (13.0-18.0) |
|                                          | Intermediate | 120-139/80-89 or treated to goal                                                               | 30.1 (28.1-32.2)                    | 49.3 (46.5-52.0) | 54.7 (51.7-57.6) |
|                                          | Poor         | ≥140/90                                                                                        | 5.0 (4.1-5.8)                       | 14.2 (12.5-15.9) | 29.9 (27.4-32.3) |
| <b>HbA1c, % <sup>†</sup></b>             | Ideal        | <5.7 (untreated)                                                                               | 87.5 (85.8-89.1)                    | 64.3 (61.7-66.9) | 42.4 (39.6-45.1) |
|                                          | Intermediate | 5.7-6.5 or treated to goal                                                                     | 10.4 (9.1-11.8)                     | 26.3 (23.9-28.8) | 42.9 (40.3-45.5) |
|                                          | Poor         | ≥6.5                                                                                           | 2.1 (1.5-2.7)                       | 9.4 (7.8-10.9)   | 14.7 (13.2-16.2) |
| <b>Total CVH Score <sup>‡</sup></b>      | High         | 12-14 points                                                                                   | 13.5 (11.7-15.4)                    | 5.2 (3.9-6.4)    | 1.8 (1.2-2.5)    |
|                                          | Moderate     | 9-11 points                                                                                    | 47.6 (45.3-49.9)                    | 30.0 (27.0-32.9) | 21.9 (18.9-24.8) |
|                                          | Low          | 0-8 points                                                                                     | 38.9 (36.0-41.7)                    | 64.9 (61.7-68.1) | 76.3 (73.1-79.4) |

CI, confidence interval; CVH, cardiovascular health; HbA1c, glycated hemoglobin; NHANES, National Health and Nutrition Examination Survey

\* The 5 dietary score components include ≥4.5 cups/day of fruits/vegetables, ≥2 servings of fish per week (3.5 oz), ≥3 servings of whole grains per day (1 oz), <1500 mg/day of sodium, and <450 kcal/week of sugar-sweetened beverages. Dietary values are scaled to a 2000 kcal/day diet.

† Given that fasting plasma glucose values were only available for a subsample of NHANES participants, we used HbA1c values as a proxy for fasting glucose levels (fasting plasma glucose ≥126 mg/dL = HbA1c ≥6.5%; fasting plasma glucose 100-125 mg/dL = HbA1c 5.7-6.4%; fasting plasma glucose <100 mg/dL untreated = HbA1c <5.7% untreated), as suggested by the American Diabetes Association.

‡ The total CVH score represents the sum of individual metric point values and ranges from 0 to 14. Each individual metric was scored as ideal (2 points), intermediate (1 point), or poor (0 points). We defined overall CVH as high (12-14 points), moderate (9-11 points), or low (0-8 points).

**Table S3. Characteristics of US Adults in CVH Groups by Age Group, Sex, Race, and Cardiovascular Health: NHANES 2011-2016.**

| Characteristics *                  | White/other Men, CVH |             |             | Black Men, CVH |             |              | White/other Women, CVH |             |             | Black Women, CVH |             |             |
|------------------------------------|----------------------|-------------|-------------|----------------|-------------|--------------|------------------------|-------------|-------------|------------------|-------------|-------------|
|                                    | Low                  | Moderate    | High        | Low            | Moderate    | High         | Low                    | Moderate    | High        | Low              | Moderate    | High        |
| <b>Aged 20-39 years</b>            |                      |             |             |                |             |              |                        |             |             |                  |             |             |
| Age, years                         | 31.0 (0.3)           | 28.5 (0.4)  | 27.4 (0.5)  | 30.3 (0.5)     | 26.9 (0.6)  | 24.9 (0.6)   | 30.0 (0.3)             | 29.3 (0.3)  | 28.6 (0.8)  | 30.4 (0.4)       | 27.2 (0.7)  | 27.9 (1.8)  |
| Current smoking, %                 | 66.6 (3.3)           | 37.4 (4.5)  | 0.0 (0.0)   | 77.7 (5.2)     | 56.1 (7.5)  | 0.0 (0.0)    | 84.1 (2.6)             | 40.1 (5.8)  | 0.0 (0.0)   | 82.3 (4.8)       | 52.2 (12.4) | 0.0 (0.0)   |
| Antihypertensive med. use, %       | 5.9 (1.1)            | 1.3 (0.7)   | 0.0 (0.0)   | 10.4 (2.6)     | 1.2 (0.7)   | 0.0 (0.0)    | 6.2 (1.4)              | 0.9 (0.3)   | 0.0 (0.0)   | 14.5 (2.8)       | 0.8 (0.8)   | 0.0 (0.0)   |
| Lipid-lowering med. use, %         | 4.2 (1.0)            | 1.1 (0.7)   | 0.0 (0.0)   | 3.7 (1.7)      | 0.3 (0.3)   | 0.0 (0.0)    | 2.2 (0.9)              | 0.6 (0.4)   | 0.0 (0.0)   | 2.8 (0.8)        | 0.0 (0.0)   | 0.0 (0.0)   |
| History of diabetes, %             | 3.4 (1.0)            | 0.4 (0.2)   | 0.0 (0.0)   | 7.5 (2.4)      | 0.0 (0.0)   | 0.0 (0.0)    | 4.4 (1.3)              | 0.9 (0.5)   | 0.7 (0.6)   | 8.1 (2.4)        | 0.0 (0.0)   | 0.0 (0.0)   |
| Body mass index, kg/m <sup>2</sup> | 31.9 (0.4)           | 26.5 (0.3)  | 23.4 (0.3)  | 32.3 (0.6)     | 25.8 (0.6)  | 22.9 (0.4)   | 33.8 (0.6)             | 26.6 (0.3)  | 22.3 (0.3)  | 35.1 (0.5)       | 28.9 (0.5)  | 23.7 (1.0)  |
| Leisure physical activity, min/wk  | 163 (17)             | 456 (26)    | 596 (41)    | 342 (52)       | 633 (64)    | 1227 (271)   | 96 (20)                | 266 (22)    | 610 (67)    | 81 (13)          | 374 (82)    | 697 (147)   |
| AHA healthy diet score             | 0.5 (0.0)            | 0.7 (0.0)   | 1.4 (0.1)   | 0.6 (0.1)      | 0.5 (0.1)   | 0.9 (0.2)    | 0.6 (0.0)              | 1.0 (0.1)   | 1.5 (0.1)   | 0.6 (0.1)        | 0.7 (0.1)   | 1.6 (0.3)   |
| Total cholesterol, mg/dL           | 202.2 (1.9)          | 177.1 (1.8) | 162.7 (2.2) | 192.7 (4.1)    | 165.0 (2.1) | 151.0 (4.7)  | 189.9 (2.0)            | 176.8 (1.5) | 170.6 (2.1) | 180.1 (2.3)      | 171.1 (2.5) | 160.6 (4.5) |
| Systolic blood pressure, mmHg      | 122.9 (0.7)          | 117.2 (0.5) | 110.7 (0.8) | 128.4 (1.2)    | 119.3 (1.3) | 112.0 (0.9)  | 115.3 (0.7)            | 109.3 (0.7) | 105.7 (0.7) | 117.9 (1.1)      | 111.1 (1.1) | 107.0 (2.1) |
| Diastolic blood pressure, mmHg     | 74.0 (0.7)           | 68.9 (0.5)  | 65.1 (1.1)  | 72.3 (1.3)     | 65.7 (1.0)  | 65.7 (1.1)   | 70.2 (0.6)             | 66.6 (0.6)  | 65.8 (0.8)  | 71.3 (0.9)       | 66.0 (0.9)  | 64.5 (1.3)  |
| Hemoglobin A1c, %                  | 5.5 (0.0)            | 5.2 (0.0)   | 5.1 (0.0)   | 5.8 (0.1)      | 5.3 (0.0)   | 5.2 (0.1)    | 5.4 (0.1)              | 5.1 (0.0)   | 5.1 (0.0)   | 5.7 (0.1)        | 5.3 (0.0)   | 5.2 (0.1)   |
| <b>Aged 40-59 years</b>            |                      |             |             |                |             |              |                        |             |             |                  |             |             |
| Age, years                         | 50.4 (0.2)           | 49.0 (0.5)  | 47.8 (1.1)  | 50.2 (0.4)     | 49.1 (0.7)  | 42.4 (0.4)   | 50.7 (0.3)             | 48.9 (0.4)  | 48.1 (0.7)  | 50.2 (0.5)       | 46.8 (0.6)  | 46.8 (1.3)  |
| Current smoking, %                 | 51.4 (3.4)           | 11.0 (3.2)  | 0.0 (0.0)   | 72.4 (4.7)     | 35.7 (12.7) | 0.0 (0.0)    | 58.3 (3.9)             | 21.7 (4.6)  | 0.0 (0.0)   | 65.7 (5.3)       | 27.0 (13.6) | 0.0 (0.0)   |
| Antihypertensive med. use, %       | 26.2 (1.8)           | 8.2 (2.1)   | 1.9 (1.2)   | 42.6 (3.2)     | 13.0 (4.8)  | 0.0 (0.0)    | 28.8 (2.3)             | 12.3 (2.2)  | 0.6 (0.6)   | 49.1 (3.0)       | 11.3 (3.6)  | 11.1 (11.1) |
| Lipid-lowering med. use, %         | 21.5 (1.7)           | 10.2 (2.4)  | 7.6 (4.8)   | 26.8 (3.4)     | 3.8 (1.8)   | 0.0 (0.0)    | 21.8 (1.6)             | 7.5 (2.4)   | 0.2 (0.2)   | 19.1 (2.8)       | 4.2 (2.2)   | 0.0 (0.0)   |
| History of diabetes, %             | 13.9 (1.7)           | 2.2 (0.7)   | 0.0 (0.0)   | 18.2 (2.4)     | 6.1 (3.2)   | 0.0 (0.0)    | 15.0 (1.3)             | 2.7 (1.4)   | 0.0 (0.0)   | 15.5 (2.1)       | 4.1 (2.3)   | 0.0 (0.0)   |
| Body mass index, kg/m <sup>2</sup> | 30.5 (0.3)           | 27.1 (0.2)  | 24.1 (0.4)  | 31.2 (0.4)     | 27.0 (0.6)  | 21.4 (0.6)   | 32.4 (0.3)             | 25.4 (0.3)  | 22.4 (0.2)  | 35.3 (0.5)       | 28.1 (0.6)  | 22.9 (0.4)  |
| Leisure physical activity, min/wk  | 118 (15)             | 392 (40)    | 653 (123)   | 193 (31)       | 632 (140)   | 528 (129)    | 82 (8)                 | 278 (17)    | 655 (156)   | 160 (26)         | 300 (56)    | 518 (81)    |
| AHA healthy diet score             | 0.7 (0.0)            | 1.1 (0.1)   | 1.8 (0.1)   | 0.7 (0.0)      | 1.2 (0.1)   | 0.9 (0.7)    | 0.9 (0.0)              | 1.4 (0.1)   | 1.8 (0.1)   | 0.8 (0.1)        | 1.3 (0.1)   | 2.2 (0.5)   |
| Total cholesterol, mg/dL           | 209.3 (2.1)          | 193.2 (2.2) | 181.5 (2.9) | 193.6 (2.7)    | 180.3 (4.2) | 163.7 (22.1) | 213.6 (1.9)            | 203.0 (2.7) | 179.7 (3.3) | 201.8 (2.9)      | 184.1 (3.4) | 174.6 (5.1) |
| Systolic blood pressure, mmHg      | 126.6 (0.9)          | 117.0 (0.9) | 113.9 (1.8) | 130.3 (1.2)    | 122.0 (1.6) | 114.8 (3.1)  | 123.9 (0.8)            | 115.0 (1.0) | 108.6 (1.2) | 130.8 (1.1)      | 115.9 (1.1) | 113.1 (4.8) |
| Diastolic blood pressure, mmHg     | 77.1 (0.5)           | 73.2 (0.5)  | 69.7 (0.9)  | 78.6 (0.8)     | 73.2 (0.9)  | 72.7 (4.3)   | 73.5 (0.4)             | 71.5 (0.6)  | 67.8 (0.9)  | 75.3 (0.7)       | 70.4 (0.8)  | 69.8 (2.1)  |
| Hemoglobin A1c, %                  | 5.9 (0.1)            | 5.3 (0.0)   | 5.3 (0.1)   | 6.3 (0.1)      | 5.5 (0.1)   | 5.5 (0.1)    | 5.9 (0.0)              | 5.3 (0.0)   | 5.2 (0.0)   | 6.2 (0.1)        | 5.4 (0.1)   | 5.1 (0.1)   |
| <b>Aged ≥60 years</b>              |                      |             |             |                |             |              |                        |             |             |                  |             |             |
| Age, years                         | 69.1 (0.3)           | 69.8 (0.5)  | 66.9 (1.1)  | 68.1 (0.5)     | 70.3 (1.0)  | 71.7 (2.2)   | 70.1 (0.3)             | 69.4 (0.7)  | 69.0 (1.5)  | 68.3 (0.4)       | 69.2 (1.3)  | 71.4 (2.7)  |
| Current smoking, %                 | 25.6 (1.9)           | 0.5 (0.4)   | 0.0 (0.0)   | 42.7 (3.9)     | 5.6 (4.2)   | 0.0 (0.0)    | 25.7 (2.5)             | 4.7 (2.2)   | 0.0 (0.0)   | 32.0 (4.2)       | 2.2 (2.3)   | 0.0 (0.0)   |
| Antihypertensive med. use, %       | 52.6 (2.3)           | 28.5 (3.8)  | 6.3 (5.5)   | 68.9 (2.5)     | 34.3 (5.4)  | 33.5 (22.2)  | 59.6 (1.9)             | 39.1 (4.8)  | 15.7 (8.8)  | 72.4 (2.1)       | 42.6 (9.2)  | 52.4 (25.4) |
| Lipid-lowering med. use, %         | 52.8 (2.7)           | 32.1 (4.1)  | 18.2 (13.0) | 45.1 (3.0)     | 18.6 (5.0)  | 0.0 (0.0)    | 43.1 (1.9)             | 33.3 (4.8)  | 15.6 (7.2)  | 47.6 (3.7)       | 17.1 (6.9)  | 0.0 (0.0)   |
| History of diabetes, %             | 29.1 (2.0)           | 5.3 (1.5)   | 0.0 (0.0)   | 33.1 (3.1)     | 13.5 (4.5)  | 0.0 (0.0)    | 18.0 (1.5)             | 3.7 (1.1)   | 1.8 (1.8)   | 33.4 (2.7)       | 3.9 (3.0)   | 0.0 (0.0)   |
| Body mass index, kg/m <sup>2</sup> | 30.5 (0.3)           | 25.4 (0.3)  | 21.7 (0.7)  | 29.4 (0.4)     | 26.2 (0.5)  | 22.2 (1.1)   | 30.3 (0.3)             | 25.5 (0.5)  | 22.1 (0.6)  | 33.2 (0.5)       | 27.3 (0.7)  | 23.3 (1.2)  |
| Leisure physical activity, min/wk  | 110 (10)             | 427 (41)    | 431 (47)    | 65 (8)         | 508 (84)    | 592 (179)    | 69 (5)                 | 327 (50)    | 594 (99)    | 67 (10)          | 328 (36)    | 248 (63)    |
| AHA healthy diet score             | 1.0 (0.0)            | 1.4 (0.1)   | 2.2 (0.1)   | 0.9 (0.0)      | 1.6 (0.1)   | 2.1 (0.9)    | 1.2 (0.0)              | 1.9 (0.1)   | 2.0 (0.2)   | 1.1 (0.1)        | 1.7 (0.2)   | 3.3 (0.4)   |
| Total cholesterol, mg/dL           | 180.5 (2.1)          | 180.6 (2.8) | 167.0 (6.4) | 185.0 (3.3)    | 172.9 (3.6) | 157.7 (10.6) | 205.3 (1.6)            | 199.7 (3.4) | 189.9 (4.6) | 201.9 (2.4)      | 190.7 (5.2) | 182.2 (9.0) |
| Systolic blood pressure, mmHg      | 132.5 (0.7)          | 123.8 (1.3) | 113.5 (3.6) | 137.6 (1.4)    | 130.7 (2.2) | 116.2 (3.0)  | 134.6 (0.8)            | 123.1 (1.5) | 115.5 (2.1) | 137.9 (1.4)      | 128.7 (3.1) | 126.5 (3.7) |
| Diastolic blood pressure, mmHg     | 68.7 (0.5)           | 68.3 (0.7)  | 62.5 (2.2)  | 71.4 (1.2)     | 69.2 (1.3)  | 63.3 (0.7)   | 67.9 (0.6)             | 67.4 (1.0)  | 64.4 (1.9)  | 67.3 (0.9)       | 68.5 (1.9)  | 69.7 (3.9)  |
| Hemoglobin A1c, %                  | 6.1 (0.0)            | 5.5 (0.0)   | 5.3 (0.1)   | 6.3 (0.1)      | 5.7 (0.1)   | 5.5 (0.2)    | 5.9 (0.0)              | 5.5 (0.0)   | 5.4 (0.0)   | 6.3 (0.1)        | 5.6 (0.1)   | 5.1 (0.1)   |

AHA, American Heart Association; CVH, cardiovascular health; DBP, diastolic blood pressure; HDL, high-density lipoprotein; SBP, systolic blood pressure

\* Values are expressed as mean (standard error) or % (standard error) taking into consideration the complex survey design of the National Health and Nutrition Examination Survey 2011-2016

**Table S4. Characteristics of US Adults in CVH Groups by Age Group, Sex, Race, and Cardiovascular Health: The Lifetime Risk Pooling Project.**

| Characteristics *                  | White/other Men, CVH |              |              | Black Men, CVH |              |              | White/other Women, CVH |              |              | Black Women, CVH |              |              |
|------------------------------------|----------------------|--------------|--------------|----------------|--------------|--------------|------------------------|--------------|--------------|------------------|--------------|--------------|
|                                    | Low                  | Moderate     | High         | Low            | Moderate     | High         | Low                    | Moderate     | High         | Low              | Moderate     | High         |
| <b>Aged 20-39 years</b>            |                      |              |              |                |              |              |                        |              |              |                  |              |              |
| Age, years                         | 27.8 (4.6)           | 26.4 (4.0)   | 26.6 (3.5)   | 26.1 (3.3)     | 25.0 (3.1)   | 24.8 (3.1)   | 26.6 (4.2)             | 26.8 (4.0)   | 26.8 (3.8)   | 26.0 (3.3)       | 25.1 (3.3)   | 25.1 (3.3)   |
| Current smoking, %                 | 58.0                 | 25.6         | 2.4          | 64.9           | 29.4         | 1.1          | 76.8                   | 31.6         | 3.1          | 59.3             | 23.1         | 2.5          |
| Antihypertensive med. use, %       | 5.8                  | 1.6          | 0.3          | 6.2            | 1.5          | 0.0          | 2.4                    | 1.9          | 0.2          | 8.6              | 2.5          | 0.0          |
| Lipid-lowering med. use, %         | 0.5                  | 0.0          | 0.0          | 0.0            | 0.0          | 0.0          | 0.0                    | 0.0          | 0.0          | 0.0              | 0.0          | 0.0          |
| History of diabetes, %             | 0.5                  | 0.2          | 0.0          | 1.0            | 0.0          | 0.0          | 2.4                    | 0.3          | 0.0          | 0.8              | 0.3          | 0.0          |
| Body mass index, kg/m <sup>2</sup> | 27.5 (4.7)           | 24.5 (3.4)   | 22.9 (2.0)   | 27.0 (5.0)     | 24.1 (3.6)   | 22.9 (2.2)   | 28.1 (6.7)             | 23.2 (4.1)   | 21.7 (2.3)   | 29.7 (7.4)       | 24.9 (5.8)   | 22.4 (2.5)   |
| Physical activity, z-score         | -0.13 (1.02)         | 0.21 (0.92)  | 0.77 (1.03)  | -0.27 (0.85)   | 0.36 (1.08)  | 1.03 (1.12)  | -0.63 (0.58)           | -0.24 (0.73) | 0.39 (0.89)  | -0.82 (0.51)     | -0.48 (0.69) | 0.27 (0.82)  |
| aHEI diet score                    | 39.7 (8.8)           | 46.4 (10.8)  | 58.0 (11.5)  | 36.9 (8.6)     | 42.3 (10.1)  | 51.8 (15.2)  | 41.5 (9.9)             | 51.0 (10.5)  | 61.4 (9.5)   | 40.5 (8.1)       | 44.6 (10.1)  | 56.0 (11.2)  |
| Total cholesterol, mg/dL           | 201.7 (37.7)         | 176.7 (32.0) | 164.2 (23.8) | 192.3 (40.7)   | 175.8 (31.7) | 164.9 (24.8) | 191.4 (34.0)           | 178.9 (31.2) | 168.6 (24.8) | 189.8 (38.8)     | 174.9 (30.2) | 168.1 (24.8) |
| Systolic blood pressure, mmHg      | 120.3 (11.9)         | 114.7 (9.9)  | 111.2 (8.3)  | 121.3 (11.0)   | 115.6 (9.8)  | 110.5 (8.8)  | 109.4 (11.0)           | 105.1 (9.8)  | 103.1 (7.8)  | 112.1 (11.1)     | 106.9 (9.0)  | 104.8 (8.1)  |
| Diastolic blood pressure, mmHg     | 75.1 (11.3)          | 70.9 (9.1)   | 69.6 (7.6)   | 75.0 (10.7)    | 70.8 (9.5)   | 69.7 (7.7)   | 68.0 (9.4)             | 66.6 (8.6)   | 65.2 (7.1)   | 70.2 (10.5)      | 66.6 (8.6)   | 66.0 (7.5)   |
| Fasting glucose, mg/dL             | 88.3 (16.5)          | 85.8 (10.3)  | 84.1 (7.3)   | 85.9 (14.9)    | 83.4 (8.0)   | 81.2 (6.8)   | 86.6 (27.8)            | 81.5 (12.0)  | 81.0 (6.6)   | 85.4 (31.2)      | 79.2 (15.2)  | 77.8 (7.8)   |
| <b>Aged 40-59 years</b>            |                      |              |              |                |              |              |                        |              |              |                  |              |              |
| Age, years                         | 52.2 (4.5)           | 51.6 (4.5)   | 50.6 (4.5)   | 52.0 (4.3)     | 51.1 (4.3)   | 49.7 (4.3)   | 52.2 (4.5)             | 51.0 (4.5)   | 50.2 (4.4)   | 52.9 (4.1)       | 52.7 (4.1)   | 52.7 (4.0)   |
| Current smoking, %                 | 33.5                 | 11.3         | 0.4          | 43.1           | 18.7         | 6.7          | 37.1                   | 15.4         | 2.1          | 25.0             | 8.1          | 1.0          |
| Antihypertensive med. use, %       | 21.3                 | 10.1         | 2.2          | 36.2           | 17.6         | 6.7          | 28.2                   | 11.2         | 3.0          | 46.5             | 23.3         | 10.0         |
| Lipid-lowering med. use, %         | 5.3                  | 3.8          | 3.1          | 3.3            | 2.9          | 3.3          | 5.0                    | 2.5          | 1.1          | 7.4              | 4.8          | 3.0          |
| History of diabetes, %             | 3.8                  | 0.7          | 0.5          | 11.1           | 3.8          | 0.0          | 4.4                    | 0.5          | 0.0          | 13.0             | 1.5          | 0.0          |
| Body mass index, kg/m <sup>2</sup> | 28.8 (4.1)           | 26.2 (3.1)   | 24.0 (2.0)   | 28.7 (4.9)     | 26.7 (4.0)   | 23.8 (2.2)   | 29.0 (6.1)             | 24.8 (4.0)   | 22.5 (2.3)   | 32.4 (6.6)       | 27.9 (5.3)   | 24.4 (3.3)   |
| Physical activity, z-score         | 0.00 (0.97)          | 0.59 (1.05)  | 1.04 (1.09)  | -0.27 (1.03)   | 0.43 (1.42)  | 1.69 (2.84)  | -0.40 (0.79)           | 0.14 (0.91)  | 0.76 (1.05)  | -0.36 (0.86)     | 0.16 (0.99)  | 0.59 (0.92)  |
| aHEI diet score                    | 41.7 (10.2)          | 48.4 (11.4)  | 56.9 (10.8)  | 41.8 (9.8)     | 50.1 (11.8)  | 62.9 (10.5)  | 44.9 (9.6)             | 51.1 (10.1)  | 59.1 (8.6)   | 46.2 (10.6)      | 55.5 (11.0)  | 63.1 (9.5)   |
| Total cholesterol, mg/dL           | 215.9 (38.0)         | 195.9 (32.5) | 179.0 (25.8) | 210.7 (45.8)   | 187.7 (34.7) | 169.5 (20.7) | 226.8 (42.9)           | 201.1 (33.6) | 182.8 (27.5) | 221.8 (43.7)     | 197.7 (36.8) | 181.5 (29.8) |
| Systolic blood pressure, mmHg      | 123.2 (15.5)         | 114.5 (12.2) | 108.7 (10.2) | 131.6 (20.3)   | 117.5 (14.0) | 110.1 (9.3)  | 121.4 (18.1)           | 111.1 (14.0) | 104.6 (10.1) | 131.1 (19.1)     | 119.0 (15.0) | 112.9 (12.1) |
| Diastolic blood pressure, mmHg     | 76.4 (10.1)          | 71.8 (8.1)   | 68.4 (7.0)   | 83.9 (12.2)    | 76.1 (9.8)   | 72.3 (7.7)   | 72.3 (10.0)            | 68.2 (8.9)   | 65.2 (7.2)   | 80.0 (10.6)      | 74.7 (9.2)   | 71.0 (7.4)   |
| Fasting glucose, mg/dL             | 107.8 (28.1)         | 96.0 (10.5)  | 91.6 (7.1)   | 112.1 (42.7)   | 92.5 (12.4)  | 86.9 (7.2)   | 106.4 (35.0)           | 92.4 (12.7)  | 88.8 (7.9)   | 114.3 (51.7)     | 89.9 (13.4)  | 84.6 (7.5)   |
| <b>Aged ≥60 years</b>              |                      |              |              |                |              |              |                        |              |              |                  |              |              |
| Age, years                         | 67.3 (5.4)           | 67.8 (5.6)   | 68.1 (5.8)   | 66.1 (5.2)     | 67.8 (5.6)   | 68.1 (5.6)   | 68.1 (5.4)             | 67.6 (5.5)   | 67.4 (5.6)   | 66.5 (5.0)       | 66.9 (5.3)   | 65.8 (4.6)   |
| Current smoking, %                 | 16.4                 | 5.1          | 0.0          | 25.2           | 15.1         | 0.0          | 19.2                   | 5.9          | 0.0          | 14.2             | 3.9          | 0.0          |
| Antihypertensive med. use, %       | 40.3                 | 26.1         | 9.0          | 54.9           | 46.4         | 18.8         | 45.9                   | 25.5         | 10.4         | 58.9             | 39.7         | 14.0         |
| Lipid-lowering med. use, %         | 8.3                  | 7.6          | 3.0          | 12.6           | 8.4          | 0.0          | 9.1                    | 7.1          | 6.0          | 18.4             | 14.7         | 8.8          |
| History of diabetes, %             | 5.3                  | 1.7          | 0.0          | 19.1           | 5.1          | 6.7          | 4.1                    | 0.5          | 0.0          | 16.2             | 3.2          | 0.0          |
| Body mass index, kg/m <sup>2</sup> | 28.0 (3.7)           | 25.7 (3.0)   | 24.0 (2.4)   | 28.3 (4.7)     | 25.7 (3.9)   | 24.1 (2.7)   | 28.0 (4.9)             | 24.3 (3.4)   | 22.6 (2.3)   | 31.2 (6.1)       | 26.8 (4.7)   | 23.6 (3.3)   |
| Physical activity, z-score         | 0.08 (1.05)          | 0.61 (1.11)  | 1.01 (0.99)  | -0.22 (0.88)   | 0.25 (1.22)  | 1.21 (2.15)  | -0.25 (0.77)           | 0.24 (0.95)  | 0.92 (1.27)  | -0.20 (0.97)     | 0.26 (0.96)  | 0.80 (1.27)  |
| aHEI diet score                    | 44.9 (10.1)          | 52.6 (11.8)  | 62.6 (9.8)   | 46.4 (11.1)    | 55.1 (12.3)  | 65.0 (8.2)   | 45.1 (11.1)            | 53.6 (12.8)  | 63.3 (10.9)  | 51.8 (11.1)      | 61.3 (10.7)  | 65.5 (8.6)   |
| Total cholesterol, mg/dL           | 208.9 (38.8)         | 190.5 (30.9) | 175.9 (23.9) | 200.2 (40.1)   | 176.0 (33.6) | 180.9 (24.9) | 229.4 (38.9)           | 209.2 (32.0) | 190.8 (24.7) | 227.1 (44.3)     | 207.6 (36.1) | 193.8 (29.3) |
| Systolic blood pressure, mmHg      | 136.1 (19.7)         | 123.9 (17.9) | 114.8 (11.2) | 137.9 (19.8)   | 126.3 (18.4) | 115.3 (11.7) | 136.2 (20.5)           | 124.5 (18.8) | 114.9 (14.0) | 137.7 (20.1)     | 126.7 (16.9) | 116.3 (9.7)  |
| Diastolic blood pressure, mmHg     | 74.8 (10.3)          | 70.9 (9.4)   | 67.7 (7.9)   | 79.5 (11.7)    | 74.8 (8.4)   | 72.8 (7.7)   | 71.0 (10.5)            | 67.5 (9.6)   | 64.8 (7.9)   | 76.9 (10.3)      | 73.6 (9.2)   | 70.0 (7.3)   |
| Fasting glucose, mg/dL             | 114.6 (37.6)         | 96.0 (14.6)  | 89.3 (8.0)   | 114.8 (42.5)   | 92.4 (20.2)  | 87.8 (8.6)   | 108.0 (32.6)           | 92.1 (11.5)  | 88.0 (7.9)   | 110.5 (42.6)     | 90.7 (13.9)  | 88.3 (8.2)   |

aHEI, adjusted Healthy Eating Index 2010; CVH, cardiovascular health; DBP, diastolic blood pressure; HDL, high-density lipoprotein; SBP, systolic blood pressure

\* Values are expressed as mean (standard deviation) or %.

**Table S5. Associations Between Individual Cardiovascular Health Metrics and Incident Cardiovascular Disease Events: The Lifetime Risk Pooling Project.**

| Subgroups           | Men, Hazard Ratios (95% CIs) * |                  |                  | Women, Hazard Ratios (95% CIs) * |                  |                  |
|---------------------|--------------------------------|------------------|------------------|----------------------------------|------------------|------------------|
|                     | Poor                           | Intermediate     | Ideal            | Poor                             | Intermediate     | Ideal            |
| <b>Aged 20-39</b>   |                                |                  |                  |                                  |                  |                  |
| Smoking             | 1 [Reference]                  | 0.30 (0.14-0.63) | 0.43 (0.29-0.63) | 1 [Reference]                    | 0.95 (0.50-1.80) | 0.69 (0.43-1.11) |
| Body mass index     | 1 [Reference]                  | 0.62 (0.36-1.07) | 0.45 (0.27-0.76) | 1 [Reference]                    | 0.55 (0.30-1.01) | 0.44 (0.26-0.73) |
| Physical activity   | 1 [Reference]                  | 0.70 (0.44-1.13) | 0.59 (0.35-0.99) | 1 [Reference]                    | 0.71 (0.45-1.13) | 0.57 (0.27-1.20) |
| Healthy diet score  | 1 [Reference]                  | 0.63 (0.42-0.94) | 0.31 (0.15-0.65) | 1 [Reference]                    | 0.81 (0.50-1.31) | 0.77 (0.41-1.45) |
| Total cholesterol   | 1 [Reference]                  | 0.75 (0.41-1.38) | 0.31 (0.17-0.56) | 1 [Reference]                    | 0.80 (0.30-2.15) | 0.71 (0.28-1.77) |
| Blood pressure      | 1 [Reference]                  | 0.58 (0.28-1.18) | 0.39 (0.19-0.80) | 1 [Reference]                    | 0.27 (0.12-0.60) | 0.10 (0.05-0.21) |
| Fasting glucose     | 1 [Reference]                  | 0.87 (0.11-7.25) | 0.50 (0.07-3.57) | 1 [Reference]                    | 0.20 (0.06-0.70) | 0.07 (0.03-0.15) |
| <b>Aged 40-59 y</b> |                                |                  |                  |                                  |                  |                  |
| Smoking             | 1 [Reference]                  | 0.54 (0.47-0.61) | 0.44 (0.38-0.51) | 1 [Reference]                    | 0.37 (0.32-0.44) | 0.40 (0.35-0.46) |
| Body mass index     | 1 [Reference]                  | 0.69 (0.60-0.78) | 0.56 (0.48-0.66) | 1 [Reference]                    | 0.68 (0.60-0.79) | 0.51 (0.43-0.59) |
| Physical activity   | 1 [Reference]                  | 0.81 (0.71-0.93) | 0.67 (0.57-0.78) | 1 [Reference]                    | 0.81 (0.71-0.93) | 0.75 (0.63-0.89) |
| Healthy diet score  | 1 [Reference]                  | 0.77 (0.68-0.87) | 0.57 (0.46-0.70) | 1 [Reference]                    | 0.81 (0.71-0.92) | 0.48 (0.39-0.59) |
| Total cholesterol   | 1 [Reference]                  | 0.77 (0.67-0.89) | 0.68 (0.59-0.79) | 1 [Reference]                    | 0.74 (0.64-0.86) | 0.68 (0.59-0.79) |
| Blood pressure      | 1 [Reference]                  | 0.62 (0.53-0.71) | 0.37 (0.31-0.43) | 1 [Reference]                    | 0.64 (0.56-0.74) | 0.34 (0.29-0.41) |
| Fasting glucose     | 1 [Reference]                  | 0.45 (0.37-0.53) | 0.35 (0.30-0.42) | 1 [Reference]                    | 0.34 (0.29-0.41) | 0.24 (0.20-0.28) |
| <b>Aged ≥60 y</b>   |                                |                  |                  |                                  |                  |                  |
| Smoking             | 1 [Reference]                  | 0.66 (0.58-0.76) | 0.57 (0.49-0.66) | 1 [Reference]                    | 0.65 (0.57-0.74) | 0.58 (0.51-0.65) |
| Body mass index     | 1 [Reference]                  | 0.87 (0.77-0.98) | 0.84 (0.74-0.96) | 1 [Reference]                    | 0.72 (0.65-0.80) | 0.62 (0.56-0.69) |
| Physical activity   | 1 [Reference]                  | 0.83 (0.73-0.94) | 0.71 (0.62-0.82) | 1 [Reference]                    | 0.84 (0.76-0.92) | 0.68 (0.60-0.77) |
| Healthy diet score  | 1 [Reference]                  | 0.79 (0.72-0.87) | 0.55 (0.47-0.66) | 1 [Reference]                    | 0.80 (0.73-0.87) | 0.53 (0.46-0.61) |
| Total cholesterol   | 1 [Reference]                  | 0.88 (0.76-1.01) | 0.81 (0.71-0.93) | 1 [Reference]                    | 0.89 (0.81-0.98) | 1.04 (0.93-1.16) |
| Blood pressure      | 1 [Reference]                  | 0.73 (0.66-0.81) | 0.47 (0.40-0.54) | 1 [Reference]                    | 0.72 (0.66-0.79) | 0.43 (0.38-0.50) |
| Fasting glucose     | 1 [Reference]                  | 0.58 (0.51-0.67) | 0.46 (0.40-0.53) | 1 [Reference]                    | 0.56 (0.49-0.64) | 0.42 (0.37-0.48) |

CI, confidence interval; CVH, cardiovascular health

\* Hazard ratios are adjusted for age (continuous) and race



**Table S6. Expected Number of Annual Cardiovascular Disease Events and Rates in US Adults by Age, Sex, and Race Groups.**

| <b>Subgroups</b>    | <b>US Adults Aged ≥20 y,<br/>No. *</b> | <b>Events (95% CI)<br/>per 1000 Person-Years †</b> | <b>Expected CVD Events,<br/>No. per Year †</b> |
|---------------------|----------------------------------------|----------------------------------------------------|------------------------------------------------|
| <b>Aged 20-39 y</b> |                                        |                                                    |                                                |
| White/other men     | 36,805,000                             | 2.16 (1.60-2.72)                                   | 80,000                                         |
| Black men           | 4,801,000                              | 3.15 (2.34-3.95)                                   | 15,000                                         |
| White/other women   | 35,689,000                             | 0.98 (0.63-1.33)                                   | 35,000                                         |
| Black women         | 5,732,000                              | 1.87 (1.38-2.37)                                   | 11,000                                         |
| <b>Aged 40-59 y</b> |                                        |                                                    |                                                |
| White/other men     | 36,008,000                             | 12.49 (11.68-13.31)                                | 450,000                                        |
| Black men           | 4,201,000                              | 18.94 (16.88-21.00)                                | 80,000                                         |
| White/other women   | 38,695,000                             | 7.39 (6.82-7.95)                                   | 286,000                                        |
| Black women         | 5,655,000                              | 10.86 (9.86-11.86)                                 | 61,000                                         |
| <b>Aged ≥60 y</b>   |                                        |                                                    |                                                |
| White/other men     | 26,554,000                             | 34.51 (32.80-36.23)                                | 916,000                                        |
| Black men           | 2,210,000                              | 27.82 (24.14-31.49)                                | 61,000                                         |
| White/other women   | 29,774,000                             | 26.87 (25.59-28.15)                                | 800,000                                        |
| Black women         | 3,083,000                              | 17.89 (16.38-19.41)                                | 55,000                                         |
| <b>Total</b>        | 229,209,000                            | 12.43                                              | 2,850,000                                      |

CVD, cardiovascular disease; NHANES, National Health and Nutrition Examination Survey

\* US population numbers were estimated from NHANES 2011-2016 and are representative of the US non-institutionalized population.

† Expected CVD event numbers were estimated using Poisson regression models calibrated to reflect an annual 2.85 million incident major CVD events in the US adult population per year, as reported by the American Heart Association.

**Table S7. Cardiovascular Health Metrics and Potential Impact of Improving Cardiovascular Health Among US Adults by Age Group.**

| Subgroups           | Proportion of US Adults in CVH Metric Categories, % (95% CI) |                  |                  | Achievement of Intermediate or Ideal Levels |                                        | Achievement of Ideal Levels |                                        |
|---------------------|--------------------------------------------------------------|------------------|------------------|---------------------------------------------|----------------------------------------|-----------------------------|----------------------------------------|
|                     | Poor                                                         | Intermediate     | Ideal            | PAF, % (95% CI)                             | Events Prevented (95% CI), Thousands * | PAF, % (95% CI)             | Events Prevented (95% CI), Thousands † |
| <b>Aged 20-39 y</b> |                                                              |                  |                  |                                             |                                        |                             |                                        |
| CVH Behaviors       |                                                              |                  |                  |                                             |                                        |                             |                                        |
| Smoking             | 21.2 (19.1-23.2)                                             | 4.3 (3.2-5.5)    | 74.5 (72.1-77.0) | 23.8 (7.7, 39.6) ‡                          | 33 (11, 55)                            | 16.1 (8.0, 24.7) ‡          | 22 (11, 34)                            |
| Body mass index     | 33.9 (31.5-36.4)                                             | 30.2 (27.9-32.4) | 35.9 (33.0-38.7) | NA §                                        | NA §                                   | 35.2 (15.7, 53.5)           | 49 (22, 74)                            |
| Physical activity   | 35.6 (32.4-38.8)                                             | 15.5 (14.1-16.9) | 48.9 (46.0-51.8) | NA §                                        | NA §                                   | 13.9 (1.6, 26.8)            | 19 (2, 37)                             |
| Healthy diet score  | 80.2 (77.9-82.5)                                             | 19.6 (17.3-21.8) | 0.2 (0.1-0.3)    | 22.6 (3.6, 36.4)                            | 31 (5, 51)                             | 45.8 (26.0, 57.0)           | 64 (36, 79)                            |
| CVH Factors         |                                                              |                  |                  |                                             |                                        |                             |                                        |
| Total cholesterol   | 6.5 (5.4-7.6)                                                | 22.0 (19.6-24.3) | 71.5 (68.9-74.1) | NA §                                        | NA §                                   | 23.3 (15.0, 32.0)           | 32 (21, 44)                            |
| Blood pressure      | 5.0 (4.1-5.8)                                                | 30.1 (28.1-32.2) | 64.9 (62.8-67.0) | 2.9 (0.7, 7.0)                              | 4 (1, 10)                              | 28.5 (13.3, 44.2)           | 40 (18, 61)                            |
| HbA1c               | 2.1 (1.5-2.7)                                                | 10.4 (9.1-11.8)  | 87.5 (85.8-89.1) | 2.8 (0.3, 9.6)                              | 4 (0, 13)                              | 11.1 (5.5, 17.9)            | 15 (8, 25)                             |
| <b>Aged 40-59 y</b> |                                                              |                  |                  |                                             |                                        |                             |                                        |
| CVH Behaviors       |                                                              |                  |                  |                                             |                                        |                             |                                        |
| Smoking             | 21.8 (19.4-24.1)                                             | 2.5 (1.6-3.4)    | 75.7 (73.5-77.9) | 20.6 (15.5, 26.0)                           | 178 (134, 225)                         | 23.6 (18.5, 29.1)           | 204 (160, 251)                         |
| Body mass index     | 40.4 (37.5-43.3)                                             | 33.7 (31.2-36.2) | 25.9 (23.8-28.0) | 15.9 (10.2, 21.9)                           | 138 (88, 189)                          | 30.8 (23.7, 37.5)           | 266 (205, 325)                         |
| Physical activity   | 44.5 (41.0-48.1)                                             | 18.7 (16.0-21.5) | 36.7 (33.7-39.8) | 9.5 (3.2, 15.7)                             | 82 (28, 136)                           | 18.7 (11.2, 26.1)           | 161 (97, 225)                          |
| Healthy diet score  | 74.8 (72.1-77.6)                                             | 24.6 (21.9-27.4) | 0.6 (0.3-0.8)    | 17.6 (8.8, 25.7)                            | 152 (76, 222)                          | 44.4 (33.8, 53.5)           | 384 (292, 463)                         |
| CVH Factors         |                                                              |                  |                  |                                             |                                        |                             |                                        |
| Total cholesterol   | 18.0 (16.1-19.9)                                             | 45.6 (42.6-48.7) | 36.4 (33.7-39.1) | 5.3 (2.4, 8.7)                              | 46 (20, 75)                            | 11.9 (5.6, 18.3)            | 103 (49, 158)                          |
| Blood pressure      | 14.2 (12.5-15.9)                                             | 49.3 (46.5-52.0) | 36.5 (34.0-39.1) | 8.5 (5.4, 12.0)                             | 73 (46, 103)                           | 39.6 (33.8, 45.3)           | 343 (293, 392)                         |
| HbA1c               | 9.4 (7.8-10.9)                                               | 26.3 (23.9-28.8) | 64.3 (61.7-66.9) | 12.9 (8.9, 17.5)                            | 112 (77, 152)                          | 24.3 (19.1, 29.8)           | 210 (165, 258)                         |
| <b>Aged ≥60 y</b>   |                                                              |                  |                  |                                             |                                        |                             |                                        |
| CVH Behaviors       |                                                              |                  |                  |                                             |                                        |                             |                                        |
| Smoking             | 10.6 (9.4-11.9)                                              | 1.1 (0.7-1.6)    | 88.2 (86.8-89.6) | 5.3 (3.2, 7.6)                              | 97 (60, 141)                           | 7.5 (5.1, 10.2)             | 139 (95, 188)                          |
| Body mass index     | 39.1 (36.3-41.9)                                             | 35.8 (33.5-38.0) | 25.1 (22.6-27.7) | 9.1 (4.6, 13.6)                             | 167 (86, 250)                          | 14.4 (8.7, 20.1)            | 266 (161, 370)                         |
| Physical activity   | 53.7 (50.6-56.8)                                             | 16.4 (14.5-18.3) | 29.9 (27.2-32.6) | 9.6 (3.8, 15.4)                             | 177 (71, 284)                          | 20.9 (14.4, 27.4)           | 386 (266, 505)                         |
| Healthy diet score  | 66.6 (63.7-69.6)                                             | 32.0 (29.1-34.8) | 1.4 (1.0-1.8)    | 14.9 (8.9, 20.8)                            | 274 (165, 383)                         | 41.2 (33.6, 48.0)           | 760 (621, 886)                         |
| CVH Factors         |                                                              |                  |                  |                                             |                                        |                             |                                        |
| Total cholesterol   | 12.0 (10.6-13.5)                                             | 62.1 (59.7-64.6) | 25.8 (23.7-28.0) | 0.9 (0.1, 1.8) ‡                            | 17 (3, 33)                             | NA §                        | NA §                                   |
| Blood pressure      | 29.9 (27.4-32.3)                                             | 54.7 (51.7-57.6) | 15.5 (13.0-18.0) | 10.0 (6.8, 13.4)                            | 185 (126, 247)                         | 40.6 (34.8, 46.1)           | 750 (642, 851)                         |
| HbA1c               | 14.7 (13.2-16.2)                                             | 42.9 (40.3-45.5) | 42.4 (39.6-45.1) | 9.9 (6.9, 13.2)                             | 182 (128, 244)                         | 23.2 (18.8, 27.7)           | 428 (347, 511)                         |

CI, confidence interval; CVH, cardiovascular health; HbA1c, glycated hemoglobin; NA, not available; PAF, population attributable fraction

\* Number of CVD events prevented annually if (1) all adults with poor levels had intermediate levels; and (2) all adults with intermediate levels or ideal levels remained in these levels

† Number of CVD events prevented annually if all adults with poor levels or moderate levels had ideal levels

‡ The PAFs for achievement of intermediate or ideal CVH metric levels can be larger than the corresponding PAFs for achievement of high CVH if the magnitude of association comparing poor and intermediate levels is larger than the magnitude of association comparing poor and ideal levels.

§ The PAFs cannot be calculated for the CVH metrics with hazard ratios of 1 or greater

**Table S8. Cardiovascular Health Metrics and Potential Impact of Improving Cardiovascular Health Among US Adults by Sex.**

| Subgroups          | Proportion of US Adults in CVH Metric Categories, % (95% CI) |                  |                  | Achievement of Intermediate or Ideal Levels |                                        | Achievement of Ideal Levels |                                        |
|--------------------|--------------------------------------------------------------|------------------|------------------|---------------------------------------------|----------------------------------------|-----------------------------|----------------------------------------|
|                    | Poor                                                         | Intermediate     | Ideal            | PAF, % (95% CI)                             | Events Prevented (95% CI), Thousands * | PAF, % (95% CI)             | Events Prevented (95% CI), Thousands † |
| <b>Men</b>         |                                                              |                  |                  |                                             |                                        |                             |                                        |
| CVH Behaviors      |                                                              |                  |                  |                                             |                                        |                             |                                        |
| Smoking            | 20.2 (18.3-22.1)                                             | 3.4 (2.6-4.3)    | 76.3 (74.3-78.3) | 11.4 (7.1, 16.1)                            | 181 (113, 255)                         | 14.6 (10.4, 19.2)           | 232 (165, 305)                         |
| Body mass index    | 35.7 (33.1-38.2)                                             | 38.4 (36.3-40.4) | 26.0 (24.3-27.6) | 8.3 (3.7, 13.0)                             | 131 (59, 206)                          | 16.0 (8.5, 23.3)            | 254 (135, 369)                         |
| Physical activity  | 42.3 (39.4-45.2)                                             | 15.6 (13.9-17.3) | 42.1 (40.0-44.2) | 9.2 (3.1, 15.3)                             | 146 (49, 243)                          | 20.0 (12.4, 27.6)           | 316 (196, 437)                         |
| Healthy diet score | 79.2 (77.3-81.1)                                             | 20.4 (18.5-22.3) | 0.3 (0.2-0.5)    | 18.4 (9.8, 26.4)                            | 292 (155, 418)                         | 42.9 (31.9, 52.1)           | 680 (506, 825)                         |
| CVH Factors        |                                                              |                  |                  |                                             |                                        |                             |                                        |
| Total cholesterol  | 11.4 (10.0-12.7)                                             | 41.9 (39.4-44.3) | 46.8 (44.3-49.2) | 1.6 (.7, 2.7)                               | 26 (10, 43)                            | 6.1 (3.4, 8.9)              | 97 (54, 141)                           |
| Blood pressure     | 16.1 (14.2-17.9)                                             | 48.5 (46.5-50.5) | 35.4 (33.2-37.7) | 9.1 (5.9, 12.5)                             | 144 (94, 198)                          | 38.5 (31.9, 45.0)           | 610 (505, 712)                         |
| HbA1c              | 9.2 (7.9-10.4)                                               | 24.5 (22.9-26.1) | 66.4 (64.4-68.3) | 10.9 (7.5, 14.8)                            | 172 (119, 234)                         | 21.7 (17.1, 26.5)           | 344 (271, 420)                         |
| <b>Women</b>       |                                                              |                  |                  |                                             |                                        |                             |                                        |
| CVH Behaviors      |                                                              |                  |                  |                                             |                                        |                             |                                        |
| Smoking            | 17.0 (15.4-18.6)                                             | 2.2 (1.5-2.9)    | 80.8 (79.0-82.6) | 10.0 (7.3, 13.1)                            | 127 (92, 165)                          | 10.5 (7.9, 13.4)            | 133 (101, 169)                         |
| Body mass index    | 39.6 (37.7-41.5)                                             | 27.9 (25.8-30.1) | 32.4 (30.1-34.7) | 13.7 (9.1, 18.4)                            | 174 (115, 233)                         | 25.8 (20.0, 31.6)           | 327 (253, 400)                         |
| Physical activity  | 45.1 (42.0-48.2)                                             | 18.2 (16.6-19.8) | 36.7 (33.7-39.6) | 8.9 (3.9, 14.0)                             | 113 (50, 177)                          | 19.8 (13.3, 26.1)           | 251 (169, 330)                         |
| Healthy diet score | 70.2 (67.6-72.9)                                             | 28.8 (26.1-31.5) | 1.0 (0.6-1.3)    | 13.1 (7.2, 18.8)                            | 166 (91, 238)                          | 41.7 (35.1, 47.7)           | 527 (444, 603)                         |
| CVH Factors        |                                                              |                  |                  |                                             |                                        |                             |                                        |
| Total cholesterol  | 13.1 (11.4-14.7)                                             | 41.1 (38.7-43.6) | 45.8 (43.2-48.4) | 3.0 (1.0, 5.2)                              | 38 (13, 65)                            | 3.1 (1.2, 4.9)              | 39 (16, 62)                            |
| Blood pressure     | 14.1 (12.9-15.4)                                             | 39.4 (37.7-41.1) | 46.5 (44.6-48.4) | 9.3 (6.3, 12.8)                             | 118 (80, 162)                          | 41.2 (35.4, 46.8)           | 522 (448, 592)                         |
| HbA1c              | 7.3 (6.5-8.0)                                                | 25.5 (24.0-27.1) | 67.2 (65.6-68.8) | 9.9 (6.8, 13.8)                             | 125 (86, 175)                          | 24.4 (19.7, 29.5)           | 309 (249, 374)                         |

CI, confidence interval; CVH, cardiovascular health; HbA1c, glycated hemoglobin; PAF, population attributable fraction

\* Number of CVD events prevented annually if (1) all adults with poor levels had intermediate levels; and (2) all adults with intermediate levels or ideal levels remained in these levels

† Number of CVD events prevented annually if all adults with poor levels or moderate levels had ideal levels

**Table S9. Cardiovascular Health Metrics and Potential Impact of Improving Cardiovascular Health Among US Adults by Race.**

| Subgroups          | Proportion of US Adults in CVH Metric Categories, % (95% CI) |                  |                  | Achievement of Intermediate or Ideal Levels |                                        | Achievement of Ideal Levels |                                        |
|--------------------|--------------------------------------------------------------|------------------|------------------|---------------------------------------------|----------------------------------------|-----------------------------|----------------------------------------|
|                    | Poor                                                         | Intermediate     | Ideal            | PAF, % (95% CI)                             | Events Prevented (95% CI), Thousands * | PAF, % (95% CI)             | Events Prevented (95% CI), Thousands † |
| <b>White/other</b> |                                                              |                  |                  |                                             |                                        |                             |                                        |
| CVH Behaviors      |                                                              |                  |                  |                                             |                                        |                             |                                        |
| Smoking            | 17.9 (16.4-19.4)                                             | 2.9 (2.3-3.5)    | 79.2 (77.7-80.8) | 10.1 (6.7, 13.8)                            | 258 (171, 354)                         | 12.1 (8.8, 15.7)            | 309 (224, 401)                         |
| Body mass index    | 36.0 (34.0-37.9)                                             | 33.9 (32.2-35.7) | 30.1 (28.3-31.9) | 10.2 (5.8, 14.9)                            | 262 (147, 381)                         | 19.6 (12.9, 26.1)           | 500 (330, 667)                         |
| Physical activity  | 43.2 (40.4-45.9)                                             | 17.1 (15.6-18.5) | 39.7 (37.5-42.0) | 9.1 (3.4, 14.7)                             | 232 (88, 376)                          | 19.9 (12.9, 26.9)           | 510 (330, 689)                         |
| Healthy diet score | 73.9 (71.7-76.1)                                             | 25.5 (23.3-27.7) | 0.6 (0.4-0.8)    | 16.0 (8.7, 22.9)                            | 409 (221, 586)                         | 42.4 (33.5, 50.1)           | 1086 (856, 1283)                       |
| CVH Factors        |                                                              |                  |                  |                                             |                                        |                             |                                        |
| Total cholesterol  | 12.6 (11.4-13.8)                                             | 42.3 (40.1-44.4) | 45.1 (43.1-47.2) | 2.2 (0.8, 3.8)                              | 57 (21, 97)                            | 4.6 (2.4, 6.8)              | 118 (62, 174)                          |
| Blood pressure     | 14.4 (12.9-15.8)                                             | 43.4 (41.9-45.0) | 42.2 (40.4-44.0) | 8.9 (5.9, 12.2)                             | 227 (152, 311)                         | 39.3 (33.1, 45.3)           | 1006 (846, 1159)                       |
| HbA1c              | 7.6 (6.7-8.6)                                                | 23.7 (22.3-25.0) | 68.7 (67.1-70.3) | 9.8 (6.8, 13.5)                             | 251 (174, 346)                         | 22.1 (17.6, 26.9)           | 564 (449, 687)                         |
| <b>Black</b>       |                                                              |                  |                  |                                             |                                        |                             |                                        |
| CVH Behaviors      |                                                              |                  |                  |                                             |                                        |                             |                                        |
| Smoking            | 23.8 (21.2-26.4)                                             | 2.3 (1.5-3.1)    | 73.9 (71.0-76.8) | 17.2 (11.5, 22.9)                           | 50 (33, 67)                            | 19.5 (14.3, 25.0)           | 57 (42, 73)                            |
| Body mass index    | 51.7 (48.9-54.5)                                             | 25.3 (22.9-27.7) | 23.0 (21.0-25.0) | 14.7 (9.2, 20.2)                            | 43 (27, 59)                            | 27.6 (19.7, 35.2)           | 80 (57, 103)                           |
| Physical activity  | 48.4 (45.5-51.3)                                             | 15.9 (14.2-17.6) | 35.7 (32.9-38.5) | 9.3 (3.4, 15.1)                             | 27 (10, 44)                            | 19.6 (12.0, 27.1)           | 57 (35, 79)                            |
| Healthy diet score | 80.1 (77.3-82.9)                                             | 18.9 (16.2-21.5) | 1.1 (0.6-1.5)    | 16.6 (8.4, 24.1)                            | 48 (25, 70)                            | 41.8 (32.0, 49.9)           | 122 (93, 145)                          |
| CVH Factors        |                                                              |                  |                  |                                             |                                        |                             |                                        |
| Total cholesterol  | 9.5 (7.9-11.2)                                               | 35.2 (32.7-37.8) | 55.3 (52.7-57.8) | 2.2 (0.8, 3.9)                              | 6 (2, 11)                              | 6.1 (2.6, 9.7)              | 18 (8, 28)                             |
| Blood pressure     | 20.7 (18.7-22.8)                                             | 46.4 (44.3-48.5) | 32.9 (30.4-35.3) | 11.9 (7.6, 16.8)                            | 35 (22, 49)                            | 43.4 (36.5, 49.9)           | 126 (106, 145)                         |
| HbA1c              | 12.4 (11.0-13.8)                                             | 35.8 (33.3-38.3) | 51.8 (49.0-54.5) | 15.9 (10.9, 21.9)                           | 46 (32, 64)                            | 30.6 (24.3, 36.6)           | 89 (71, 107)                           |

CI, confidence interval; CVH, cardiovascular health; HbA1c, glycated hemoglobin; PAF, population attributable fraction

\* Number of CVD events prevented annually if (1) all adults with poor levels had intermediate levels; and (2) all adults with intermediate levels or ideal levels remained in these levels

† Number of CVD events prevented annually if all adults with poor levels or moderate levels had ideal levels

**Table S10. Mean Cardiovascular Health Scores and Potential Impact of Improving the Continuous Cardiovascular Health Score Among US Adults.**

| Subgroups                 | CVH Score, Mean (95% CI) | Per Increase of Mean CVH Score |                                           |                  |                                           |                  |                                           | Achievement of Maximum CVH Score (14) |                                           |
|---------------------------|--------------------------|--------------------------------|-------------------------------------------|------------------|-------------------------------------------|------------------|-------------------------------------------|---------------------------------------|-------------------------------------------|
|                           |                          | 1 Point                        |                                           | 2 Points         |                                           | 3 Points         |                                           | PIF, % (95% CI)                       | Events Prevented, No. (95% CI), Thousands |
|                           |                          | PIF, % (95% CI)                | Events Prevented, No. (95% CI), Thousands | PIF, % (95% CI)  | Events Prevented, No. (95% CI), Thousands | PIF, % (95% CI)  | Events Prevented, No. (95% CI), Thousands |                                       |                                           |
| <b>Aged 20-39 y</b>       |                          |                                |                                           |                  |                                           |                  |                                           |                                       |                                           |
| White/other men           | 8.77 (8.58-8.97)         | 30.8 (24.3-37.0)               | 25 (19-29)                                | 52.2 (42.7-60.3) | 41 (34-48)                                | 66.9 (56.6-75.0) | 53 (45-60)                                | 85.4 (76.6-91.1)                      | 68 (61-72)                                |
| Black men                 | 8.54 (8.24-8.84)         | 30.8 (24.1-36.7)               | 5 (4-6)                                   | 52.2 (42.4-59.9) | 8 (6-9)                                   | 66.9 (56.3-74.6) | 10 (9-11)                                 | 86.6 (77.7-91.9)                      | 13 (12-14)                                |
| White/other women         | 9.39 (9.22-9.56)         | 24.6 (16.3-32.0)               | 9 (6-11)                                  | 43.2 (30.0-53.8) | 15 (10-19)                                | 57.2 (41.5-68.6) | 20 (14-24)                                | 72.8 (56.0-83.2)                      | 25 (20-29)                                |
| Black women               | 8.25 (8.02-8.47)         | 24.6 (16.4-32.1)               | 3 (2-3)                                   | 43.2 (30.1-53.8) | 5 (3-6)                                   | 57.2 (41.5-68.6) | 6 (4-7)                                   | 80.4 (64.2-89.3)                      | 9 (7-10)                                  |
| Total                     | 8.99 (8.85-9.13)         | 28.8 (21.7-35.3)               | 40 (30-50)                                | 49.3 (38.5-58.1) | 69 (54-82)                                | 63.8 (51.7-72.9) | 89 (72-102)                               | 82.1 (70.7-89.1)                      | 115 (99-125)                              |
| <b>Aged 40-59 y</b>       |                          |                                |                                           |                  |                                           |                  |                                           |                                       |                                           |
| White/other men           | 7.49 (7.27-7.71)         | 23.1 (21.0-25.2)               | 104 (94-113)                              | 40.9 (37.6-44.0) | 184 (169-198)                             | 54.5 (50.7-58.1) | 245 (228-261)                             | 81.9 (78.3-85.0)                      | 369 (352-382)                             |
| Black men                 | 6.53 (6.28-6.79)         | 23.1 (21.0-25.2)               | 18 (17-20)                                | 40.9 (37.6-44.0) | 33 (30-35)                                | 54.5 (50.7-58.1) | 43 (40-46)                                | 85.9 (82.6-88.7)                      | 68 (66-71)                                |
| White/other women         | 7.78 (7.58-7.99)         | 24.6 (22.5-26.6)               | 70 (64-76)                                | 43.2 (40.0-46.1) | 123 (114-132)                             | 57.2 (53.5-60.4) | 163 (153-173)                             | 82.7 (79.4-85.5)                      | 236 (227-244)                             |
| Black women               | 6.80 (6.53-7.08)         | 24.6 (22.6-26.6)               | 15 (14-16)                                | 43.2 (40.1-46.2) | 27 (25-28)                                | 57.2 (53.6-60.5) | 35 (33-37)                                | 86.9 (84.0-89.4)                      | 53 (52-55)                                |
| Total                     | 7.53 (7.38-7.68)         | 23.7 (21.6-25.7)               | 208 (189-226)                             | 41.8 (38.5-44.8) | 366 (338-393)                             | 55.6 (51.8-59.0) | 487 (454-517)                             | 82.9 (79.4-85.8)                      | 727 (696-752)                             |
| <b>Aged ≥60 y</b>         |                          |                                |                                           |                  |                                           |                  |                                           |                                       |                                           |
| White/other men           | 7.04 (6.85-7.23)         | 16.7 (14.8-18.6)               | 153 (135-171)                             | 30.7 (27.3-33.8) | 281 (251-310)                             | 42.3 (38.1-46.1) | 387 (349-423)                             | 72.0 (67.0-76.3)                      | 660 (614-700)                             |
| Black men                 | 6.31 (5.99-6.63)         | 16.7 (14.7-18.6)               | 10 (9-11)                                 | 30.7 (27.3-33.8) | 19 (17-21)                                | 42.3 (38.0-46.1) | 26 (23-28)                                | 75.5 (70.4-79.7)                      | 46 (43-49)                                |
| White/other women         | 7.15 (6.96-7.35)         | 17.2 (15.5-18.8)               | 137 (124-150)                             | 31.4 (28.6-34.1) | 251 (229-272)                             | 43.2 (39.7-46.4) | 346 (317-372)                             | 72.5 (68.3-76.1)                      | 580 (546-609)                             |
| Black women               | 6.01 (5.79-6.24)         | 17.2 (15.5-18.8)               | 9 (9-10)                                  | 31.4 (28.6-34.1) | 17 (16-19)                                | 43.2 (39.7-46.5) | 24 (22-26)                                | 77.8 (73.8-81.2)                      | 43 (41-45)                                |
| Total                     | 7.02 (6.87-7.17)         | 16.9 (15.1-18.7)               | 311 (277-343)                             | 31.0 (27.9-33.9) | 568 (512-622)                             | 42.7 (38.8-46.3) | 783 (711-848)                             | 72.5 (67.9-76.5)                      | 1330 (1244-1402)                          |
| <b>Men</b>                |                          |                                |                                           |                  |                                           |                  |                                           |                                       |                                           |
| Men                       | 7.79 (7.66-7.93)         | 19.7 (17.4-21.9)               | 315 (278-350)                             | 35.3 (31.6-38.7) | 566 (507-621)                             | 47.8 (43.3-51.8) | 765 (694-830)                             | 76.4 (71.6-80.4)                      | 1225 (1147-1288)                          |
| <b>Women</b>              |                          |                                |                                           |                  |                                           |                  |                                           |                                       |                                           |
| Women                     | 8.04 (7.90-8.18)         | 19.5 (17.5-21.4)               | 244 (218-268)                             | 35.1 (31.8-38.1) | 438 (397-476)                             | 47.6 (43.6-51.2) | 594 (544-638)                             | 75.9 (71.5-79.4)                      | 947 (892-991)                             |
| <b>White/other Adults</b> |                          |                                |                                           |                  |                                           |                  |                                           |                                       |                                           |
| White/other Adults        | 8.00 (7.87-8.13)         | 19.4 (17.3-21.5)               | 498 (443-551)                             | 34.9 (31.4-38.1) | 896 (807-979)                             | 47.3 (43.1-51.1) | 1215 (1107-1312)                          | 75.5 (70.9-79.4)                      | 1939 (1819-2037)                          |
| <b>Black Adults</b>       |                          |                                |                                           |                  |                                           |                  |                                           |                                       |                                           |
| Black Adults              | 7.27 (7.14-7.40)         | 21.4 (18.9-23.7)               | 61 (54-67)                                | 38.0 (34.1-41.6) | 108 (97-118)                              | 51.0 (46.4-55.1) | 145 (131-156)                             | 82.1 (77.6-85.6)                      | 233 (220-243)                             |
| <b>All Adults</b>         |                          |                                |                                           |                  |                                           |                  |                                           |                                       |                                           |
| All Adults                | 7.92 (7.80-8.04)         | 19.6 (17.4-21.7)               | 559 (497-618)                             | 35.2 (31.7-38.5) | 1004 (904-1096)                           | 47.7 (43.4-51.5) | 1359 (1238-1468)                          | 76.2 (71.5-80.0)                      | 2171 (2039-2279)                          |

CI, confidence interval; CVH, cardiovascular health; PAF, population attributable fraction; PIF, potential impact fraction

**Figure S1. Associations Between Cardiovascular Health Score and Incident Cardiovascular Disease Events by Age Group and Sex: The Lifetime Risk Pooling Project.**

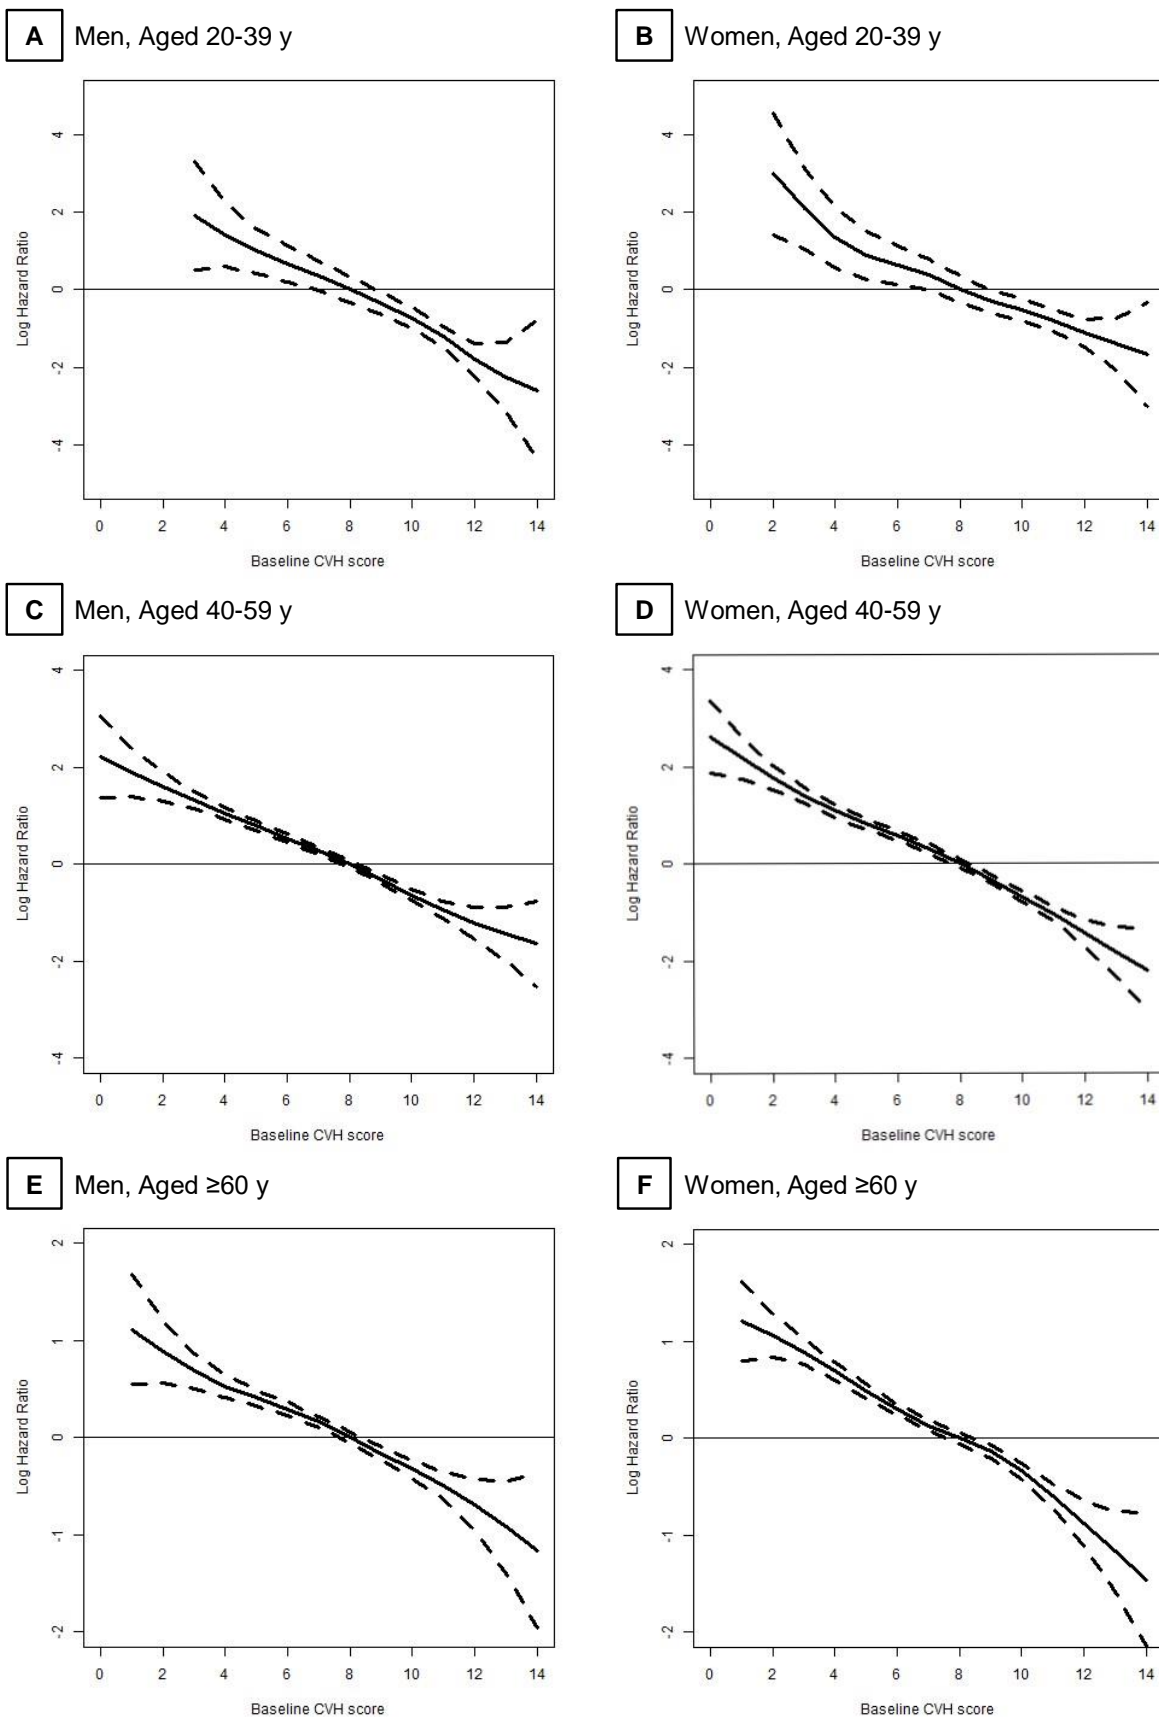

Dashed lines indicate 95% confidence intervals; CVH indicates cardiovascular health

Figure S2. Distribution of Cardiovascular Health Scores in US Adults: NHANES 2011-2016 and the LRPP.

**A** National Health and Nutrition Examination Survey 2011-2016

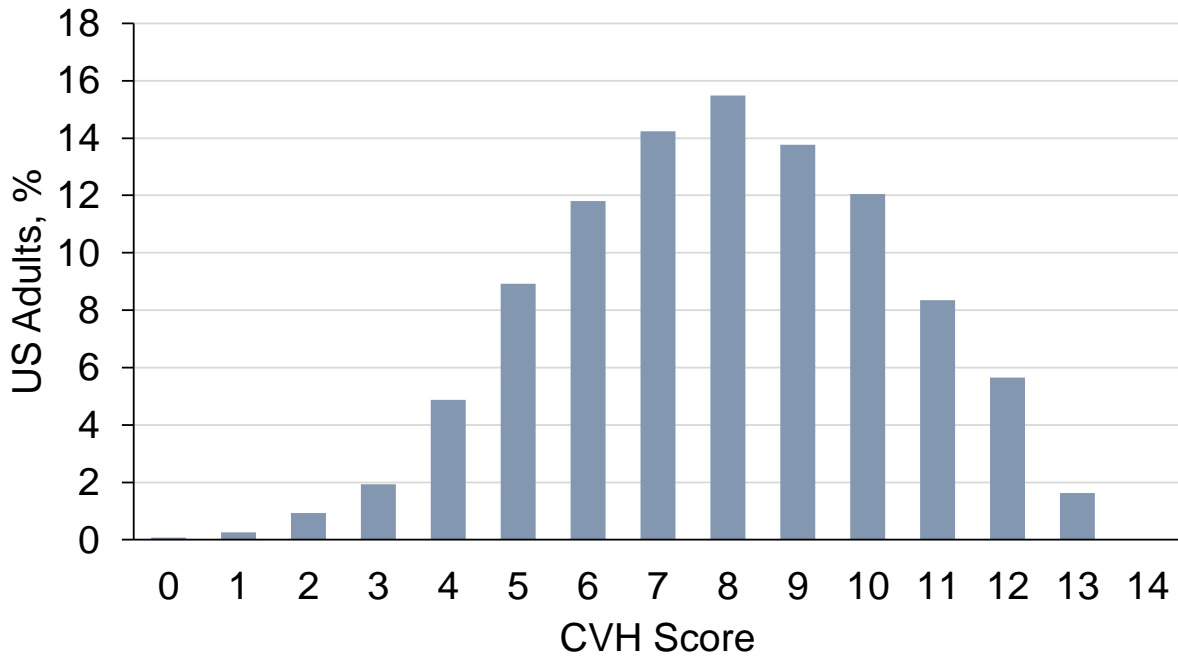

**B** Lifetime Risk Pooling Project

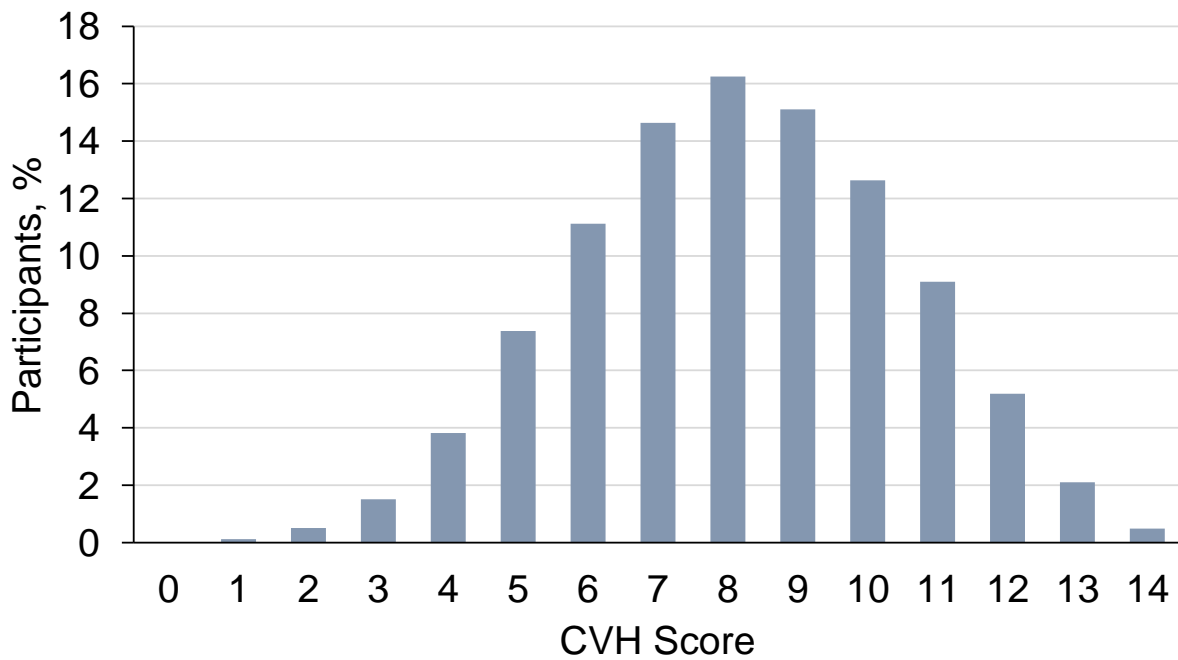

CVH indicates cardiovascular health; LRPP, Lifetime Risk Pooling Project
